# Supplementary material for: Composition and dimension dependent static and dynamic stabilities of inorganic mixed halide antimony perovskites
Source: Royal Society of Chemistry journal article supplement (doi:10.1039/d1tc01223a), 2021-01-01
Supplement: d1tc01223a1.pdf [file d1tc01223a1.pdf]

# Composition and Dimension Dependent Static and Dynamic Stabilities of Inorganic Mixed Halide Antimony Perovskites

## Supporting Information

Jack Yang

School of Material Science and Engineering, University of New South Wales, Sydney, New South Wales 2052, Australia and Materials and Manufacturing Futures Institute, University of New South Wales, Sydney, New South Wales 2052, Australia\*

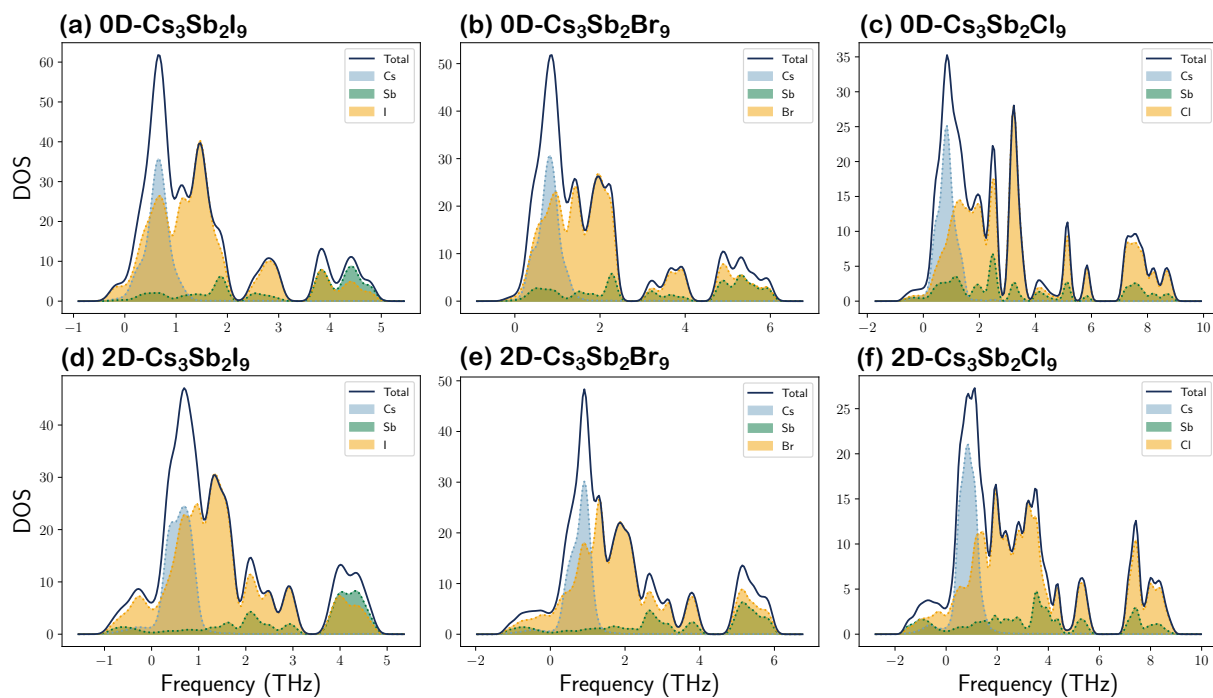

FIG. S1: Total and atom-resolved harmonic phonon density-of-states for 0D and 2D  $\text{Cs}_3\text{Sb}_2\text{I}_9$ .

\*Electronic address: [jianliang.yang1@unsw.edu.au](mailto:jianliang.yang1@unsw.edu.au)
